# Supplementary material
Source: Springer Nature journal article supplement (https://www.springermedizin.de/resource/supplementary/12937_2008_205_MOESM1_ESM.pdf/25654732)
Supplement: MOESM1 [file 25654732]

**100% NSAID use**

29 Subjects Recruited (V1)

↓ -7 subjects (not suitable)

22 Subjects (V2)

+ Aquamin

8 Subjects (V2)

↓ -2 subjects  
(non-compliance)

6 Subjects (V3)

6 Subjects (V4)

↓ -1 subject  
(pain)

5 Subjects (V6)

**50%  
NSAID use**

+ Placebo

14 Subjects (V2)

14 Subjects (V3)

14 Subjects (V4)

↓ -5 subjects  
(pain)

9 Subjects (V6)

**0%  
NSAID use**
